# Supplementary material
Source: publisher site journal article supplement (https://static.cambridge.org/content/id/urn:cambridge.org:id:article:S0022112015001287/resource/name/FLM1500128_SupplementaryMaterial.pdf)
Supplement: Supplementary file 1 [file FLM1500128_SupplementaryMaterial.pdf]

**Supplemental Materials for:**

**“Microstructure and Rheology Relationships for Shear Thickening Colloidal Dispersions”**

**A. Kate Gurnon and Norman J. Wagner**

**Journal of Fluid Mechanics**

**Summary of integrals dependencies (superscript indicates neutron beam direction):**

Radial geometry: (velocity – vorticity)

$$W_0^{gradient}(q)(B_{0,0}^+(q), -B_{2,0}^+(q), B_{4,0}^+(q))$$

$$W_2^{gradient}(q)(B_{2,2}^+(q), B_{4,2}^+(q))$$

$$W_4^{gradient}(q)(B_{4,4}^+(q))$$

$$W_{12}^{gradient}(q) = 0$$

1-2 flow plane geometry: (velocity – velocity gradient)

$$W_0^{vorticity}(q)(B_{0,0}^+(q), B_{2,0}^+(q), B_{2,2}^+(q), B_{4,0}^+(q), B_{4,2}^+(q), B_{4,4}^+(q))$$

$$W_2^{vorticity}(q)(B_{2,0}^+(q), -B_{2,2}^+(q), B_{4,0}^+(q), B_{4,2}^+(q), -B_{4,4}^+(q))$$

$$W_4^{vorticity}(q)(B_{4,0}^+(q), -B_{4,2}^+(q), B_{4,4}^+(q))$$

$$W_{12}^{vorticity}(q)(B_{2,1}^+(q), B_{4,1}^+(q))$$

Tangential geometry: (velocity gradient – vorticity)

$$W_0^{velocity}(q)(B_{0,0}^+(q), B_{2,0}^+(q), B_{2,2}^+(q)B_{4,0}^+(q), -B_{4,2}^+(q), -B_{4,4}^+(q))$$

$$W_2^{velocity}(q)(B_{2,0}^+(q), -B_{2,2}^+(q), -B_{4,0}^+(q), -B_{4,2}^+(q), B_{4,4}^+(q))$$

$$W_4^{velocity}(q)(-B_{4,0}^+(q), B_{4,2}^+(q), -B_{4,4}^+(q))$$

$$W_{12}^{velocity}(q) = 0$$

From Theory the hydrodynamic and thermodynamic shear stresses are: (from Ackerson and Wagner eqns 52 and 62)

$$\tau^{\text{thermodynamic}}(\dot{\gamma}) = -\frac{\rho}{\pi\sqrt{30\pi}} \int \theta^*(q) B_{2,1}^+(q; Pe) q^2 dq$$

$$\tau^{\text{hydrodynamic}}(\dot{\gamma}) / 2\dot{\gamma}\mu = 1 + \frac{5}{2}\phi(1+\phi) + 2.7\phi^2 + \frac{5}{2}\phi\sqrt{\pi} \int \left( \begin{array}{l} B_{0,0}^+(q; Pe) \left( 2\alpha(q) + \frac{4}{15}\zeta_0(q) \right) \\ + B_{2,0}^+(q; Pe) \left( \frac{2}{3\sqrt{5}}\beta(q) - \frac{4\sqrt{2}}{21\sqrt{7}}\zeta_2(q) \right) \\ + B_{2,2}^+(q; Pe) \left( \frac{\sqrt{2}}{\sqrt{15}}\beta(q) + \frac{2\sqrt{2}}{105}\zeta_2(q) \right) \\ + B_{4,0}^+(q; Pe) \left( \frac{-16}{105}\zeta_4(q) \right) \\ + B_{4,2}^+(q; Pe) \left( \frac{4\sqrt{2}}{21\sqrt{5}} - \frac{16}{105}\zeta_4(q) \right) \end{array} \right) q^2 dq$$

And for the thermodynamic and hydrodynamic first and second normal stresses are:

$$N_1^{\text{thermodynamic}}(\dot{\gamma}) = \frac{\rho}{\pi\sqrt{30\pi}} \int \theta^*(q) B_{2,2}^+(q; Pe) - \sqrt{6} B_{2,0}^+(q; Pe) q^2 dq$$

$$N_2^{\text{thermodynamic}}(\dot{\gamma}) = \frac{\rho}{\pi\sqrt{30\pi}} \int \theta^*(q) B_{2,2}^+(q; Pe) + \sqrt{6} B_{2,0}^+(q; Pe) q^2 dq$$

$$N_1^{\text{hydrodynamic}}(\dot{\gamma}) / 2\dot{\gamma}\mu = -5\phi\sqrt{\pi} \int \left( \begin{aligned} & B_{4,1}^+(q; Pe) \left( \frac{5\sqrt{6} + 24\sqrt{5}}{105\sqrt{30}} \zeta_4(q) \right) \\ & + B_{4,3}^+(q; Pe) \left( \frac{1}{3\sqrt{35}} \zeta_4(q) \right) \end{aligned} \right) q^2 dq$$

$$N_2^{\text{hydrodynamic}}(\dot{\gamma}) / 2\dot{\gamma}\mu = -5\phi\sqrt{\pi} \int \left( \begin{aligned} & B_{2,1}^+(q; Pe) \left( \frac{2\sqrt{2}}{\sqrt{15}} \beta(q) + \frac{2\sqrt{2}}{7\sqrt{15}} \zeta_2(q) \right) \\ & + B_{4,1}^+(q; Pe) \left( \frac{5\sqrt{6} - 24\sqrt{5}}{105\sqrt{30}} \zeta_4(q) \right) \\ & + B_{4,3}^+(q; Pe) \left( \frac{1}{3\sqrt{35}} \zeta_4(q) \right) \end{aligned} \right) q^2 dq$$

For SANS decomposition in 3 planes of shear:

Starting with the spherical harmonic expansion in terms of the spherical coordinate system shown here:

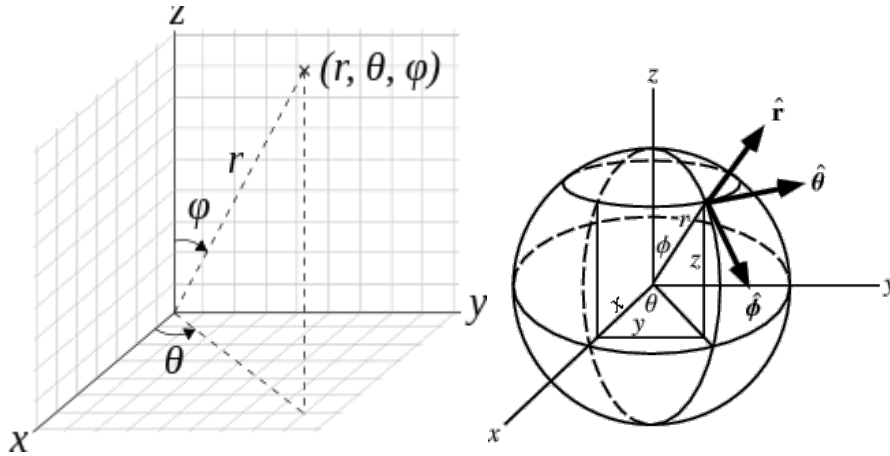

$$\hat{h}(q) = \sum_{l,m} B_{l,m}^+(q) \left( Y_{l,-m}(\Omega_k) + (-1)^m Y_{l,m}(\Omega_k) \right), \quad 1 \geq m \geq 0$$

$$\hat{h}(q) = \sum_{l,m} B_{l,m}^+(q) \left( Y_{l,-m}(\Omega_k) + (-1)^m Y_{l,m}(\Omega_k) \right)$$

$$[l=0, m=0] = B_{0,0}^+(q) \left( Y_{0,-0}(\Omega_k) + (-1)^0 Y_{0,0}(\Omega_k) \right)$$

$$[l=0, m=0] = B_{0,0}^+(q) \left( \frac{1}{2\sqrt{\pi}} + \frac{1}{2\sqrt{\pi}} \right)$$

$$[l=0, m=0] = B_{0,0}^+(q) \left( \frac{1}{\sqrt{\pi}} \right)$$

$$[l = 2, m = 0] = B_{2,0}^+(q) \left( Y_{2,-0}(\Omega_k) + (-1)^0 Y_{2,0}(\Omega_k) \right)$$

$$[l = 2, m = 0] = B_{2,0}^+(q) \left( \sqrt{\frac{5}{4\pi}} (3 \cos^2 \theta - 1) \right)$$

$$[l = 2, m = 1] = B_{2,1}^+(q) \left( Y_{2,-1}(\Omega_k) + (-1)^1 Y_{2,1}(\Omega_k) \right)$$

$$[l = 2, m = 1] = B_{2,1}^+(q) \left( \frac{1}{2} e^{-i\phi} \sqrt{\frac{15}{2\pi}} \cos(\theta) \sin(\theta) - \frac{-1}{2} e^{i\phi} \sqrt{\frac{15}{2\pi}} \cos(\theta) \sin(\theta) \right)$$

$$[l = 2, m = 2] = B_{2,2}^+(q) \left( Y_{2,-2}(\Omega_k) + (-1)^2 Y_{2,2}(\Omega_k) \right)$$

$$[l = 2, m = 2] = B_{2,2}^+(q) \left( \frac{1}{4} e^{-2i\phi} \sqrt{\frac{15}{2\pi}} \sin^2(\theta) + \frac{1}{4} e^{2i\phi} \sqrt{\frac{15}{2\pi}} \sin^2(\theta) \right)$$

$$[l = 4, m = 0] = B_{4,0}^+(q) \left( Y_{4,-0}(\Omega_k) + (-1)^0 Y_{4,0}(\Omega_k) \right)$$

$$[l = 4, m = 0] = B_{4,0}^+(q) \left( \frac{3(3 - 30 \cos^2(\theta) + 35 \cos^4(\theta))}{8\sqrt{\pi}} \right)$$

$$[l = 4, m = 1] = B_{4,1}^+(q) \left( Y_{4,-1}(\Omega_k) + (-1)^1 Y_{4,1}(\Omega_k) \right)$$

$$[l = 4, m = 1] = B_{4,1}^+(q) \left( \frac{3\sqrt{5}}{8\sqrt{\pi}} e^{-i\phi} \cos(\theta) \sin(\theta) (-3 + 7 \cos^2(\theta)) - \frac{-3\sqrt{5}}{8\sqrt{\pi}} e^{i\phi} \cos(\theta) \sin(\theta) (-3 + 7 \cos^2(\theta)) \right)$$

$$[l = 4, m = 2] = B_{4,2}^+(q) \left( Y_{4,-2}(\Omega_k) + (-1)^2 Y_{4,2}(\Omega_k) \right)$$

$$[l = 4, m = 2] = B_{4,2}^+(q) \left( \frac{3}{8} e^{-2i\phi} \sqrt{\frac{5}{2\pi}} \sin^2(\theta) (-1 + 7 \cos^2(\theta)) + \frac{3}{8} e^{2i\phi} \sqrt{\frac{5}{2\pi}} \sin^2(\theta) (-1 + 7 \cos^2(\theta)) \right)$$

$$[l = 4, m = 3] = B_{4,3}^+(q) \left( Y_{4,-3}(\Omega_k) + (-1)^3 Y_{4,3}(\Omega_k) \right)$$

$$[l = 4, m = 3] = B_{4,3}^+(q) \left( \frac{3}{8} e^{-3i\phi} \sqrt{\frac{35}{\pi}} \cos(\theta) \sin^3(\theta) - \frac{-3}{8} e^{3i\phi} \sqrt{\frac{35}{\pi}} \cos(\theta) \sin^3(\theta) \right)$$

$$[l = 4, m = 4] = B_{4,4}^+(q) \left( Y_{4,-4}(\Omega_k) + (-1)^4 Y_{4,4}(\Omega_k) \right)$$

$$[l = 4, m = 4] = B_{4,4}^+(q) \left( \frac{3\sqrt{35}}{16\sqrt{2\pi}} e^{-4i\phi} \sin^4(\theta) + \frac{3\sqrt{35}}{16\sqrt{2\pi}} e^{4i\phi} \sin^4(\theta) \right)$$

To change from spherical harmonics to Cartesian coordinate frame as defined below we use the following definitions:

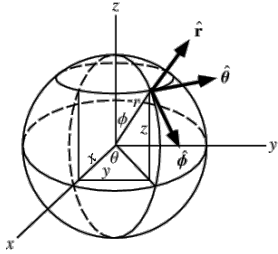

$$e^{i\phi} = \frac{x + iy}{\sqrt{x^2 + y^2}} \quad \text{and} \quad e^{-i\phi} = \frac{x - iy}{\sqrt{x^2 + y^2}}$$

$$e^{2i\phi} = \frac{(x + iy)^2}{x^2 + y^2} = \frac{x^2 + 2ixy - y^2}{x^2 + y^2} \quad \text{and} \quad e^{-2i\phi} = \frac{(x - iy)^2}{x^2 + y^2} = \frac{x^2 - 2ixy - y^2}{x^2 + y^2}$$

$$e^{3i\phi} = \frac{(x + iy)^3}{(x^2 + y^2)^{3/2}} = \frac{x^3 + 3ix^2y - 3xy^2 - iy^3}{(x^2 + y^2)^{3/2}} \quad \text{and} \quad e^{-3i\phi} = \frac{(x - iy)^3}{(x^2 + y^2)^{3/2}} = \frac{x^3 - 3ix^2y - 3xy^2 + iy^3}{(x^2 + y^2)^{3/2}}$$

$$e^{4i\phi} = \frac{(x + iy)^4}{(x^2 + y^2)^2} = \frac{x^4 + 4ix^3y - 6x^2y^2 - 4xy^3 + y^4}{(x^2 + y^2)^2} \quad \text{and} \quad e^{-4i\phi} = \frac{(x - iy)^4}{(x^2 + y^2)^2} = \frac{x^4 - 4ix^3y - 6x^2y^2 + 4xy^3 + y^4}{(x^2 + y^2)^2}$$

$$\sin(\theta) = \sqrt{\frac{x^2 + y^2}{x^2 + y^2 + z^2}}$$

$$\cos(\theta) = \frac{z}{\sqrt{x^2 + y^2 + z^2}}$$

In Cartesian coordinate system (x, y, z)

$$[l=0, m=0] = B_{0,0}^+(q) \left( \frac{1}{\sqrt{\pi}} \right)$$

$$[l=2, m=0] = B_{2,0}^+(q) \left( \sqrt{\frac{5}{4\pi}} (3 \cos^2 \theta - 1) \right)$$

$$[l=2, m=0] = B_{2,0}^+(q) \left( \sqrt{\frac{5}{4\pi}} \left( 3 \left( \frac{z}{\sqrt{x^2 + y^2 + z^2}} \right)^2 - 1 \right) \right)$$

$$[l=2, m=1] = B_{2,1}^+(q) \left( Y_{2,-1}(\Omega_k) + (-1)^1 Y_{2,1}(\Omega_k) \right)$$

$$[l=2, m=1] = B_{2,1}^+(q) \left( \frac{1}{2} e^{-i\phi} \sqrt{\frac{15}{2\pi}} \cos(\theta) \sin(\theta) - \frac{-1}{2} e^{i\phi} \sqrt{\frac{15}{2\pi}} \cos(\theta) \sin(\theta) \right)$$

$$[l=2, m=1] = B_{2,1}^+(q) \left( \frac{1}{2} e^{-i\phi} \sqrt{\frac{15}{2\pi}} \cos(\theta) \sin(\theta) + \frac{1}{2} e^{i\phi} \sqrt{\frac{15}{2\pi}} \cos(\theta) \sin(\theta) \right)$$

$$[l=2, m=1] = B_{2,1}^+(q) \left( \cos(\phi) \sqrt{\frac{15}{2\pi}} \cos(\theta) \sin(\theta) \right)$$

$$[l=2, m=1] = B_{2,1}^+(q) \left( \sqrt{\frac{15}{2\pi}} \left( \frac{x}{\sqrt{x^2 + y^2}} \right) \left( \frac{z}{\sqrt{x^2 + y^2 + z^2}} \right) \left( \sqrt{\frac{x^2 + y^2}{x^2 + y^2 + z^2}} \right) \right)$$

$$[l=2, m=1] = B_{2,1}^+(q) \left( \sqrt{\frac{15}{2\pi}} \left( \frac{xz}{(x^2 + y^2 + z^2)} \right) \right)$$



$$[l = 2, m = 2] = B_{2,2}^+(q) \left( Y_{2,-2}(\Omega_k) + (-1)^2 Y_{2,2}(\Omega_k) \right)$$

$$[l = 2, m = 2] = B_{2,2}^+(q) \left( \frac{1}{4} e^{-2i\phi} \sqrt{\frac{15}{2\pi}} \sin^2(\theta) + \frac{1}{4} e^{2i\phi} \sqrt{\frac{15}{2\pi}} \sin^2(\theta) \right)$$

$$[l = 2, m = 2] = B_{2,2}^+(q) \left( \sqrt{\frac{15}{8\pi}} e^{2i\phi} \sin^2(\theta) \right)$$

$$[l = 2, m = 2] = B_{2,2}^+(q) \left( \sqrt{\frac{15}{8\pi}} \left( \frac{x^2 - y^2}{x^2 + y^2} \right) \left( \sqrt{\frac{x^2 + y^2}{x^2 + y^2 + z^2}} \right)^2 \right)$$

$$[l = 2, m = 2] = B_{2,2}^+(q) \left( \sqrt{\frac{15}{8\pi}} \left( \frac{x^2 - y^2}{x^2 + y^2 + z^2} \right) \right)$$

$$[l = 4, m = 0] = B_{4,0}^+(q) \left( Y_{4,-0}(\Omega_k) + (-1)^0 Y_{4,0}(\Omega_k) \right)$$

$$[l = 4, m = 0] = B_{4,0}^+(q) \left( \frac{3(3 - 30 \cos^2(\theta) + 35 \cos^4(\theta))}{8\sqrt{\pi}} \right)$$

$$[l = 4, m = 0] = B_{4,0}^+(q) \frac{3}{8\sqrt{\pi}} \left( 3 - 30 \left( \frac{z}{\sqrt{x^2 + y^2 + z^2}} \right)^2 + 35 \left( \frac{z}{\sqrt{x^2 + y^2 + z^2}} \right)^4 \right)$$

$$[l=4, m=1] = B_{4,1}^+(q) \left( Y_{4,-1}(\Omega_k) + (-1)^1 Y_{4,1}(\Omega_k) \right)$$

$$[l=4, m=1] = B_{4,1}^+(q) \left( \frac{3\sqrt{5}}{8\sqrt{\pi}} e^{-i\phi} \cos(\theta) \sin(\theta) (-3 + 7 \cos^2(\theta)) - \frac{3\sqrt{5}}{8\sqrt{\pi}} e^{i\phi} \cos(\theta) \sin(\theta) (-3 + 7 \cos^2(\theta)) \right)$$

$$[l=4, m=1] = B_{4,1}^+(q) \left( \frac{3\sqrt{5}}{4\sqrt{\pi}} e^{-i\phi} \cos(\theta) \sin(\theta) (-3 + 7 \cos^2(\theta)) \right)$$

$$[l=4, m=1] = B_{4,1}^+(q) \left( \frac{3\sqrt{5}}{4\sqrt{\pi}} \frac{x}{\sqrt{x^2 + y^2}} \frac{z}{\sqrt{x^2 + y^2 + z^2}} \sqrt{\frac{x^2 + y^2}{x^2 + y^2 + z^2}} \left( -3 + 7 \left( \frac{z}{\sqrt{x^2 + y^2 + z^2}} \right)^2 \right) \right)$$

$$[l=4, m=1] = B_{4,1}^+(q) \left( \frac{3\sqrt{5}}{4\sqrt{\pi}} \frac{xz}{x^2 + y^2 + z^2} \left( -3 + 7 \left( \frac{z^2}{x^2 + y^2 + z^2} \right) \right) \right)$$

$$[l=4, m=1] = B_{4,1}^+(q) \left( \frac{3\sqrt{5}}{4\sqrt{\pi}} \frac{xz}{x^2 + y^2 + z^2} \left( 7 \left( \frac{z^2}{x^2 + y^2 + z^2} \right) - 3 \right) \right)$$

$$[l=4, m=2] = B_{4,2}^+(q) \left( Y_{4,-2}(\Omega_k) + (-1)^2 Y_{4,2}(\Omega_k) \right)$$

$$[l=4, m=2] = B_{4,2}^+(q) \left( \frac{3}{8} e^{-2i\phi} \sqrt{\frac{5}{2\pi}} \sin^2(\theta) (-1 + 7 \cos^2(\theta)) + \frac{3}{8} e^{2i\phi} \sqrt{\frac{5}{2\pi}} \sin^2(\theta) (-1 + 7 \cos^2(\theta)) \right)$$

$$[l=4, m=2] = B_{4,2}^+(q) \left( \frac{3}{4} \sqrt{\frac{5}{2\pi}} \left( \frac{x^2 - y^2}{x^2 + y^2} \right) \left( \sqrt{\frac{x^2 + y^2}{x^2 + y^2 + z^2}} \right)^2 \left( -1 + 7 \left( \frac{z}{\sqrt{x^2 + y^2 + z^2}} \right)^2 \right) \right)$$

$$[l=4, m=2] = B_{4,2}^+(q) \left( \frac{3}{4} \sqrt{\frac{5}{2\pi}} \left( \frac{x^2 - y^2}{x^2 + y^2 + z^2} \right) \left( -1 + 7 \left( \frac{z}{\sqrt{x^2 + y^2 + z^2}} \right)^2 \right) \right)$$

$$[l = 4, m = 3] = B_{4,3}^+(q) \left( Y_{4,-3}(\Omega_k) + (-1)^3 Y_{4,3}(\Omega_k) \right)$$

$$[l = 4, m = 3] = B_{4,3}^+(q) \left( \frac{3}{8} e^{-3i\phi} \sqrt{\frac{35}{\pi}} \cos(\theta) \sin^3(\theta) - \frac{-3}{8} e^{-3i\phi} \sqrt{\frac{35}{\pi}} \cos(\theta) \sin^3(\theta) \right)$$

$$[l = 4, m = 3] = B_{4,3}^+(q) \left( \frac{3}{4} \sqrt{\frac{35}{\pi}} \right) (e^{-3i\phi}) (\cos(\theta)) (\sin^3(\theta))$$

$$[l = 4, m = 3] = B_{4,3}^+(q) \left( \frac{3}{4} \sqrt{\frac{35}{\pi}} \right) \left( \frac{x(x^2 - 3y^2)}{(x^2 + y^2)^{3/2}} \right) \left( \frac{z}{\sqrt{x^2 + y^2 + z^2}} \right) \left( \frac{x^2 + y^2}{x^2 + y^2 + z^2} \right)^{3/2}$$

$$[l = 4, m = 3] = B_{4,3}^+(q) \left( \frac{3}{4} \sqrt{\frac{35}{\pi}} \right) \left( \frac{zx(x^2 - 3y^2)}{(x^2 + y^2 + z^2)^2} \right)$$

$$[l = 4, m = 4] = B_{4,4}^+(q) \left( Y_{4,-4}(\Omega_k) + (-1)^4 Y_{4,4}(\Omega_k) \right)$$

$$[l = 4, m = 4] = B_{4,4}^+(q) \left( \frac{3\sqrt{35}}{16\sqrt{2\pi}} e^{-4i\phi} \sin^4(\theta) + \frac{3\sqrt{35}}{16\sqrt{2\pi}} e^{-4i\phi} \sin^4(\theta) \right)$$

$$[l = 4, m = 4] = B_{4,4}^+(q) \left( \frac{3\sqrt{35}}{8\sqrt{2\pi}} \right) (e^{-4i\phi}) (\sin^4(\theta))$$

$$[l = 4, m = 4] = B_{4,4}^+(q) \left( \frac{3\sqrt{35}}{8\sqrt{2\pi}} \right) \left( \frac{x^4 - 6x^2y^2 + y^4}{(x^2 + y^2)^2} \right) \left( \sqrt{\frac{x^2 + y^2}{x^2 + y^2 + z^2}} \right)^4$$

$$[l = 4, m = 4] = B_{4,4}^+(q) \left( \frac{3\sqrt{35}}{8\sqrt{2\pi}} \right) \left( \frac{x^4 - 6x^2y^2 + y^4}{(x^2 + y^2 + z^2)^2} \right)$$

Change in notation from  $x$ ,  $y$  and  $z$  to  $q$ 's where:

$$x = q_x$$

$$y = q_y$$

$$z = q_z$$

$$\text{and } q = \sqrt{x^2 + y^2 + z^2} \text{ and } q^2 = x^2 + y^2 + z^2$$

$$[l = 0, m = 0] = B_{0,0}^+(q) \left( \frac{1}{\sqrt{\pi}} \right)$$

$$[l = 2, m = 0] = B_{2,0}^+(q) \left( \sqrt{\frac{5}{4\pi}} \left( 3 \left( \frac{z}{\sqrt{x^2 + y^2 + z^2}} \right)^2 - 1 \right) \right)$$

$$[l = 2, m = 0] = B_{2,0}^+(q) \left( \sqrt{\frac{5}{4\pi}} \left( 3 \frac{q_z^2}{q^2} - 1 \right) \right)$$

$$[l = 2, m = 1] = B_{2,1}^+(q) \left( \sqrt{\frac{15}{2\pi}} \left( \frac{xz}{(x^2 + y^2 + z^2)} \right) \right)$$

$$[l = 2, m = 1] = B_{2,1}^+(q) \left( \sqrt{\frac{15}{2\pi}} \left( \frac{q_x q_z}{q^2} \right) \right)$$

$$[l = 2, m = 2] = B_{2,2}^+(q) \left( \sqrt{\frac{15}{8\pi}} \left( \frac{x^2 - y^2}{x^2 + y^2 + z^2} \right) \right)$$

$$[l = 2, m = 2] = B_{2,2}^+(q) \sqrt{\frac{15}{8\pi}} \left( \frac{q_x^2 - q_y^2}{q^2} \right)$$

$$[l = 4, m = 0] = B_{4,0}^+(q) \frac{3}{8\sqrt{\pi}} \left( 3 - 30 \left( \frac{z}{\sqrt{x^2 + y^2 + z^2}} \right)^2 + 35 \left( \frac{z}{\sqrt{x^2 + y^2 + z^2}} \right)^4 \right)$$

$$[l = 4, m = 0] = B_{4,0}^+(q) \frac{3}{8\sqrt{\pi}} \left( 3 - 30 \left( \frac{q_z^2}{q^2} \right) + 35 \left( \frac{q_z^4}{q^4} \right) \right)$$

$$[l = 4, m = 1] = B_{4,1}^+(q) \left( \frac{3\sqrt{5}}{4\sqrt{\pi}} \frac{xz}{x^2 + y^2 + z^2} \left( 7 \left( \frac{z^2}{x^2 + y^2 + z^2} \right) - 3 \right) \right)$$

$$[l = 4, m = 1] = B_{4,1}^+(q) \frac{3\sqrt{5}}{4\sqrt{\pi}} \left( \frac{q_x q_z}{q^2} \right) \left( 7 \left( \frac{q_z^2}{q^2} \right) - 3 \right)$$

$$[l = 4, m = 2] = B_{4,2}^+(q) \left( \frac{3}{4} \sqrt{\frac{5}{2\pi}} \left( \frac{x^2 - y^2}{x^2 + y^2 + z^2} \right) \left( -1 + 7 \left( \frac{z}{\sqrt{x^2 + y^2 + z^2}} \right)^2 \right) \right)$$

$$[l = 4, m = 2] = B_{4,2}^+(q) \left( \frac{3}{4} \sqrt{\frac{5}{2\pi}} \left( \frac{q_x^2 - q_y^2}{q^2} \right) \left( -1 + 7 \left( \frac{q_z^2}{q^2} \right) \right) \right)$$

$$[l = 4, m = 3] = B_{4,3}^+(q) \left( \frac{3}{4} \sqrt{\frac{35}{\pi}} \left( \frac{zx(x^2 - 3y^2)}{(x^2 + y^2 + z^2)^2} \right) \right)$$

$$[l = 4, m = 3] = B_{4,3}^+(q) \left( \frac{3}{4} \sqrt{\frac{35}{\pi}} \left( \frac{q_x q_z (q_x^2 - 3q_y^2)}{q^4} \right) \right)$$

$$[l = 4, m = 4] = B_{4,4}^+(q) \left( \frac{3\sqrt{35}}{8\sqrt{2\pi}} \right) \left( \frac{x^4 - 6xy + y^4}{(x^2 + y^2 + z^2)^2} \right)$$

$$[l = 4, m = 4] = B_{4,4}^+(q) \left( \frac{3\sqrt{35}}{8\sqrt{2\pi}} \right) \left( \frac{(q_x^4 - 6q_x q_y - q_y^4)}{q^4} \right)$$

Now define each set of spherical harmonics for each experiment (dependent upon geometry)

Radial (velocity-vorticity) where the neutrons propagate along the gradient direction such that

$$\frac{q_x}{q} = \cos(\phi_{13})$$

$$\frac{q_y}{q} = \sin(\phi_{13})$$

$$q_z = 0$$

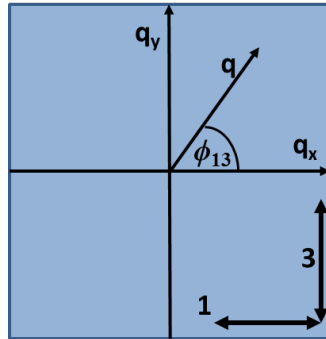

$$[l=0, m=0] = B_{0,0}^+(q) \left( \frac{1}{\sqrt{\pi}} \right)$$

$$[l=2, m=0] = B_{2,0}^+(q) \left( \sqrt{\frac{5}{4\pi}} \left( 3 \frac{q_z^2}{q^2} - 1 \right) \right)$$

$$[l=2, m=0] = -B_{2,0}^+(q) \left( \sqrt{\frac{5}{4\pi}} \right)$$

$$[l=2, m=1] = B_{2,1}^+(q) \left( \sqrt{\frac{15}{2\pi}} \left( \frac{q_x q_z}{q^2} \right) \right)$$

$$[l=2, m=1] = 0$$

$$[l = 2, m = 2] = B_{2,2}^+(q) \sqrt{\frac{15}{8\pi}} \left( \frac{q_x^2 - q_y^2}{q^2} \right)$$

$$[l = 2, m = 2] = B_{2,2}^+(q) \sqrt{\frac{15}{8\pi}} (\cos^2(\phi_{13}) - \sin^2(\phi_{13}))$$

$$[l = 2, m = 2] = B_{2,2}^+(q) \sqrt{\frac{15}{8\pi}} \cos(2\phi_{13})$$

$$[l = 4, m = 0] = B_{4,0}^+(q) \frac{3}{8\sqrt{\pi}} \left( 3 - 30 \left( \frac{q_z^2}{q^2} \right) + 35 \left( \frac{q_z^4}{q^4} \right) \right)$$

$$[l = 4, m = 0] = B_{4,0}^+(q) \left( \frac{9}{8\sqrt{\pi}} \right)$$

$$[l = 4, m = 1] = B_{4,1}^+(q) \frac{3\sqrt{5}}{4\sqrt{\pi}} \left( \frac{q_x q_z}{q^2} \right) \left( 7 \left( \frac{q_z^2}{q^2} \right) - 3 \right)$$

$$[l = 4, m = 1] = 0$$

$$[l = 4, m = 2] = B_{4,2}^+(q) \left( \frac{3\sqrt{5}}{4\sqrt{2\pi}} \right) \left( \frac{q_x^2 - q_y^2}{q^2} \right) \left( -1 + 7 \left( \frac{q_z^2}{q^2} \right) \right)$$

$$[l = 4, m = 2] = B_{4,2}^+(q) \left( \frac{-3\sqrt{5}}{4\sqrt{2\pi}} \right) \left( \frac{q_x^2 - q_y^2}{q^2} \right)$$

$$[l = 4, m = 2] = B_{4,2}^+(q) \left( \frac{-3\sqrt{5}}{4\sqrt{2\pi}} \right) (\cos^2(\phi_{13}) - \sin^2(\phi_{13}))$$

$$[l = 4, m = 2] = B_{4,2}^+(q) \left( \frac{-3\sqrt{5}}{4\sqrt{2\pi}} \right) \cos(2\phi_{13})$$



$$[l = 4, m = 3] = B_{4,3}^+(q) \left( \frac{3}{4} \sqrt{\frac{35}{\pi}} \right) \left( \frac{q_x q_z (q_x^2 - 3q_y^2)}{q^4} \right)$$

$$[l = 4, m = 3] = 0$$

$$[l = 4, m = 4] = B_{4,4}^+(q) \left( \frac{3\sqrt{35}}{8\sqrt{2\pi}} \right) \left( \frac{q_x^4 - 6q_x^2 q_y^2 + q_y^4}{q^4} \right)$$

$$[l = 4, m = 4] = B_{4,4}^+(q) \left( \frac{3\sqrt{35}}{8\sqrt{2\pi}} \right) \left( \cos^4(\phi_{13}) - 6\cos^2(\phi_{13})\sin^2(\phi_{13}) + \sin^4(\phi_{13}) \right)$$

$$[l = 4, m = 4] = B_{4,4}^+(q) \left( \frac{3\sqrt{35}}{8\sqrt{2\pi}} \right) \left( \frac{3}{8} + \frac{1}{2}\cos(2\phi_{13}) + \frac{1}{8}\cos(4\phi_{13}) - 6\frac{1}{8}(1 - \cos(4\phi_{13})) + \frac{3}{8} - \frac{1}{2}\cos(2\theta) + \frac{1}{8}\cos(4\phi_{13}) \right)$$

$$[l = 4, m = 4] = B_{4,4}^+(q) \left( \frac{3\sqrt{35}}{32\sqrt{2\pi}} \right) \cos(4\phi_{13})$$

The structure factor for the neutrons propagate along the gradient direction

$$S^{gradient}(q) = 1 + B_{0,0}^+(q) \left( \frac{1}{\sqrt{\pi}} \right) - B_{2,0}^+(q) \left( \sqrt{\frac{5}{4\pi}} \right) +$$

$$B_{2,2}^+(q) \sqrt{\frac{15}{8\pi}} \cos(2\phi_{13}) + B_{4,0}^+(q) \left( \frac{9}{8\sqrt{\pi}} \right) + B_{4,2}^+(q) \left( \frac{-3\sqrt{5}}{4\sqrt{2\pi}} \right) \cos(2\phi_{13}) + B_{4,4}^+(q) \left( \frac{3\sqrt{35}}{32\sqrt{2\pi}} \right) \cos(4\phi_{13})$$

Therefore we define the  $W_n$ 's for the neutrons in the gradient direction as:

$$W_n^{gradient}(q)S^{eq}(q) = \frac{1}{2\pi} \int_0^{2\pi} \text{Cos}(n\phi_{13})S(q)d\phi_{13}$$

$$W_0^{gradient}(q)S^{eq}(q) = \frac{1}{2\pi} \int_0^{2\pi} \text{cos}(0\phi_{13})S(q)d\phi_{13}$$

$$W_0^{gradient}(q)S^{eq}(q) = \frac{1}{2\pi} \int_0^{2\pi} \left[ 1 + B_{0,0}^+(q) \left( \frac{1}{\sqrt{\pi}} \right) - B_{2,0}^+(q) \left( \sqrt{\frac{5}{4\pi}} \right) + B_{2,2}^+(q) \sqrt{\frac{15}{8\pi}} \text{cos}(2\phi_{13}) + B_{4,0}^+(q) \left( \frac{9}{8\sqrt{\pi}} \right) \right. \\ \left. + B_{4,2}^+(q) \left( \frac{-3\sqrt{5}}{4\sqrt{2\pi}} \right) \text{cos}(2\phi_{13}) + B_{4,4}^+(q) \left( \frac{3\sqrt{35}}{32\sqrt{2\pi}} \right) \text{cos}(4\phi_{13}) + \dots (l > 4) \right] \text{cos}(0\phi_{13})d\phi_{13}$$

$$W_0^{gradient}(q)S^{eq}(q) = 1 + B_{0,0}^+(q) \left( \frac{1}{\sqrt{\pi}} \right) - B_{2,0}^+(q) \left( \sqrt{\frac{5}{4\pi}} \right) + B_{4,0}^+(q) \left( \frac{9}{8\sqrt{\pi}} \right) + \dots (l > 4)$$

$$W_2^{gradient}(q)S^{eq}(q) = \frac{1}{2\pi} \int_0^{2\pi} \cos(2\phi_{13})S(q)d\phi_{13}$$

$$W_2^{gradient}(q)S^{eq}(q) = \frac{1}{2\pi} \int_0^{2\pi} \left( 1 + B_{0,0}^+(q) \left( \frac{1}{\sqrt{\pi}} \right) - B_{2,0}^+(q) \left( \sqrt{\frac{5}{4\pi}} \right) + B_{2,2}^+(q) \sqrt{\frac{15}{8\pi}} \cos(2\phi_{13}) + B_{4,0}^+(q) \left( \frac{9}{8\sqrt{\pi}} \right) \right. \\ \left. + B_{4,2}^+(q) \left( \frac{-3\sqrt{5}}{4\sqrt{2\pi}} \right) \cos(2\phi_{13}) + B_{4,4}^+(q) \left( \frac{3\sqrt{35}}{32\sqrt{2\pi}} \right) \cos(4\phi_{13}) + \dots (l > 4) \right) \cos(2\phi_{13}) d\phi_{13}$$

$$W_2^{gradient}(q)S^{eq}(q) = \frac{1}{2\pi} \int_0^{2\pi} \left( B_{2,2}^+(q) \sqrt{\frac{15}{8\pi}} \cos(2\phi_{13}) + B_{4,2}^+(q) \left( \frac{-3\sqrt{5}}{4\sqrt{2\pi}} \right) \cos(2\phi_{13}) + \dots (l > 4) \right) \cos(2\phi_{13}) d\phi_{13}$$

$$W_2^{gradient}(q)S^{eq}(q) = B_{2,2}^+(q) \left( \sqrt{\frac{15}{8\pi}} \right) + B_{4,2}^+(q) \left( \frac{-3\sqrt{5}}{4\sqrt{2\pi}} \right) + \dots (l > 4)$$

$$W_4^{gradient}(q)S^{eq}(q) = \frac{1}{2\pi} \int_0^{2\pi} \cos(4\phi_{13})S(q)d\phi_{13}$$

$$W_4^{gradient}(q)S^{eq}(q) = \frac{1}{2\pi} \int_0^{2\pi} \left( 1 + B_{0,0}^+(q) \left( \frac{1}{\sqrt{\pi}} \right) - B_{2,0}^+(q) \left( \sqrt{\frac{5}{4\pi}} \right) + B_{2,2}^+(q) \sqrt{\frac{15}{8\pi}} \cos(2\phi_{13}) + B_{4,0}^+(q) \left( \frac{9}{8\sqrt{\pi}} \right) \right. \\ \left. + B_{4,2}^+(q) \left( \frac{-3\sqrt{5}}{4\sqrt{2\pi}} \right) \cos(2\phi_{13}) + B_{4,4}^+(q) \left( \frac{3\sqrt{35}}{32\sqrt{2\pi}} \right) \cos(4\phi_{13}) + \dots (l > 4) \right) \cos(4\phi_{13}) d\phi_{13}$$

$$W_4^{gradient}(q)S^{eq}(q) = \frac{1}{2\pi} \int_0^{2\pi} \left( B_{4,4}^+(q) \left( \frac{3\sqrt{35}}{32\sqrt{2\pi}} \right) \cos(4\phi_{13}) + \dots (l > 4) \right) \cos(4\phi_{13}) d\phi_{13}$$

$$W_4^{gradient}(q)S^{eq}(q) = 4 \left( B_{4,4}^+(q) \left( \frac{3\sqrt{35}}{32\sqrt{2\pi}} \right) + \dots (l > 4) \right)$$

$$W_6^{gradient}(q) S^{eq}(q) = \frac{1}{2\pi} \int_0^{2\pi} \cos(6\phi_{13}) S(q) d\phi_{13} = 0$$

$$W_{12}^{gradient}(q) S^{eq}(q) = \frac{1}{2\pi} \int_0^{2\pi} \cos(\phi_{13}) \sin(\phi_{13}) S(q) d\phi_{13} = 0$$

### 1-2 plane (velocity- velocity gradient)

For the 2D detector when the neutrons propagate along the vorticity direction:

$$\frac{q_x}{q} = -\sin(\phi_{21})$$

$$\frac{q_y}{q} = 0$$

$$q_z = -\cos(\phi_{21})$$

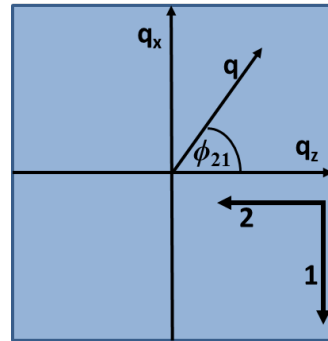

$$[l=0, m=0] = B_{0,0}^+(q) \left( \frac{1}{\sqrt{\pi}} \right)$$

$$[l = 2, m = 0] = B_{2,0}^+(q) \left( \sqrt{\frac{5}{4\pi}} \left( 3 \frac{q_z^2}{q^2} - 1 \right) \right)$$

$$[l = 2, m = 0] = B_{2,0}^+(q) \left( \sqrt{\frac{5}{4\pi}} \right) (3 \cos^2(\phi_{21}) - 1)$$

$$[l = 2, m = 0] = B_{2,0}^+(q) \left( \sqrt{\frac{5}{4\pi}} \right) \left( 3 \left( \frac{1}{2} (1 + \cos(2\phi_{21})) \right) - 1 \right)$$

$$[l = 2, m = 0] = B_{2,0}^+(q) \left( \sqrt{\frac{5}{4\pi}} \right) \left( \frac{3}{2} (1 + \cos(2\phi_{21})) - \frac{2}{2} \right)$$

$$[l = 2, m = 0] = B_{2,0}^+(q) \left( \frac{1}{2} \sqrt{\frac{5}{4\pi}} \right) \left( \frac{1}{2} + \frac{3}{2} \cos(2\phi_{21}) \right)$$

$$[l = 2, m = 0] = B_{2,0}^+(q) \left( \frac{1}{4} \sqrt{\frac{5}{\pi}} \right) (1 + 3 \cos(2\phi_{21}))$$

$$[l = 2, m = 1] = B_{2,1}^+(q) \left( \sqrt{\frac{15}{2\pi}} \left( \frac{q_x q_z}{q^2} \right) \right)$$

$$[l = 2, m = 1] = B_{2,1}^+(q) \left( \sqrt{\frac{15}{2\pi}} \right) \sin(\phi_{21}) \cos(\phi_{21})$$

$$[l = 2, m = 2] = B_{2,2}^+(q) \sqrt{\frac{15}{8\pi}} \left( \frac{q_x^2 - q_y^2}{q^2} \right)$$

$$[l = 2, m = 2] = B_{2,2}^+(q) \sqrt{\frac{15}{8\pi}} \left( \frac{q_x^2}{q^2} \right)$$

$$[l = 2, m = 2] = B_{2,2}^+(q) \left( \sqrt{\frac{15}{8\pi}} \right) \sin^2(\phi_{21})$$

$$[l = 2, m = 2] = B_{2,2}^+(q) \left( \frac{1}{2} \sqrt{\frac{15}{2\pi}} \right) \left( \frac{1}{2} (1 - \cos(2\phi_{21})) \right)$$

$$[l = 2, m = 2] = B_{2,2}^+(q) \left( \frac{1}{4} \sqrt{\frac{15}{2\pi}} \right) (1 - \cos(2\phi_{21}))$$

$$\begin{aligned}
[l = 4, m = 0] &= B_{4,0}^+(q) \left( \frac{3}{8\sqrt{\pi}} \right) \left( 3 - 30 \left( \frac{q_z^2}{q^2} \right) + 35 \left( \frac{q_z^4}{q^4} \right) \right) \\
[l = 4, m = 0] &= B_{4,0}^+(q) \left( \frac{3}{8\sqrt{\pi}} \right) (3 - 30 \cos^2(\phi_{21}) + 35 \cos^4(\phi_{21})) \\
[l = 4, m = 0] &= B_{4,0}^+(q) \left( \frac{3}{8\sqrt{\pi}} \right) \left( 3 - 15(1 + \cos(2\phi_{21})) + \frac{35}{8}(3 + 4 \cos(2\phi_{21}) + \cos(4\phi_{21})) \right) \\
[l = 4, m = 0] &= B_{4,0}^+(q) \left( \frac{3\sqrt{3}}{4\sqrt{\pi}} \right) \left( \frac{q_z}{q} \right) \left( \frac{9}{8} - \frac{20}{8} \cos(2\phi_{21}) + \frac{35}{8} \cos(4\phi_{21}) \right) \\
[l = 4, m = 0] &= B_{4,0}^+(q) \left( \frac{3\sqrt{3}}{4\sqrt{\pi}} \right) \left( \frac{q_z}{q} \right) \left( \frac{9}{8} - \frac{20}{8} \cos(2\phi_{21}) + \frac{35}{8} \cos(4\phi_{21}) \right) \\
[l = 4, m = 1] &= B_{4,1}^+(q) \left( \frac{3\sqrt{5}}{64\sqrt{\pi}} \right) \sin(\phi_{21}) \cos(\phi_{21}) \left( 9 + 20 \cos(2\phi_{21}) + \frac{35}{2} (1 + \cos(2\phi_{21})) - 3 \right) \\
[l = 4, m = 1] &= B_{4,1}^+(q) \left( \frac{3\sqrt{5}}{8\sqrt{\pi}} \right) \sin(\phi_{21}) \cos(\phi_{21}) (1 + 7 \cos(2\phi_{21})) \\
[l = 4, m = 1] &= B_{4,1}^+(q) \left( \frac{3\sqrt{5}}{8\sqrt{\pi}} \right) \left( \sin(\phi_{21}) \cos(\phi_{21}) + \frac{7}{4} \sin(4\phi_{21}) \right)
\end{aligned}$$

$$[l = 4, m = 2] = B_{4,2}^+(q) \left( \frac{3\sqrt{5}}{4\sqrt{2\pi}} \right) \left( \frac{q_x^2 - q_y^2}{q^2} \right) \left( -1 + 7 \left( \frac{q_z^2}{q^2} \right) \right)$$

$$[l = 4, m = 2] = B_{4,2}^+(q) \left( \frac{3\sqrt{5}}{4\sqrt{2\pi}} \right) \left( \frac{q_x^2}{q^2} \right) \left( -1 + 7 \left( \frac{q_z^2}{q^2} \right) \right)$$

$$[l = 4, m = 2] = B_{4,2}^+(q) \left( \frac{3\sqrt{5}}{4\sqrt{2\pi}} \right) \sin^2(\phi_{21}) (-1 + 7 \cos^2(\phi_{21}))$$

$$[l = 4, m = 2] = B_{4,2}^+(q) \left( \frac{3\sqrt{5}}{4\sqrt{2\pi}} \right) \left( \frac{1}{2} (1 - \cos(2\phi_{21})) \right) \left( -1 + 7 \frac{1}{2} (1 + \cos(2\phi_{21})) \right)$$

$$[l = 4, m = 2] = B_{4,2}^+(q) \left( \frac{3\sqrt{5}}{16\sqrt{2\pi}} \right) (1 - \cos(2\phi_{21})) (5 + 7 \cos(2\phi_{21}))$$

$$[l = 4, m = 2] = B_{4,2}^+(q) \left( \frac{3\sqrt{5}}{16\sqrt{2\pi}} \right) \left( 5 + 2 \cos(2\phi_{21}) - \frac{7}{2} - \frac{7}{2} \cos(4\phi_{21}) \right)$$

$$[l = 4, m = 2] = B_{4,2}^+(q) \left( \frac{3\sqrt{5}}{16\sqrt{2\pi}} \right) \left( \frac{3}{2} + 2 \cos(2\phi_{21}) - \frac{7}{2} \cos(4\phi_{21}) \right)$$

$$[l = 4, m = 3] = B_{4,3}^+(q) \left( \frac{3}{4} \sqrt{\frac{35}{\pi}} \right) \left( \frac{q_x^3 q_z}{q^4} \right)$$

$$[l = 4, m = 3] = B_{4,3}^+(q) \left( \frac{3}{4} \sqrt{\frac{35}{\pi}} \right) \sin^3(\phi_{21}) \cos(\phi_{21})$$

$$[l = 4, m = 3] = B_{4,3}^+(q) \left( \frac{3}{32} \sqrt{\frac{35}{\pi}} \right) (2 \sin(2\phi_{21}) + \sin(4\phi_{21}))$$



$$[l = 4, m = 4] = B_{4,4}^+(q) \left( \frac{3\sqrt{35}}{8\sqrt{2\pi}} \right) \left( \frac{(q_x^2 - 2q_x q_y - q_y^2)(q_x^2 + 2q_x q_y - q_y^2)}{q^4} \right)$$

$$[l = 4, m = 4] = B_{4,4}^+(q) \left( \frac{3\sqrt{35}}{8\sqrt{2\pi}} \right) \left( \frac{q_x^4}{q^4} \right)$$

$$[l = 4, m = 4] = B_{4,4}^+(q) \left( \frac{3\sqrt{35}}{8\sqrt{2\pi}} \right) \sin^4(\phi_{21})$$

$$[l = 4, m = 4] = B_{4,4}^+(q) \left( \frac{3\sqrt{35}}{8\sqrt{2\pi}} \right) \left( \frac{3}{8} - \frac{1}{2} \cos(2\phi_{21}) + \frac{1}{8} \cos(4\phi_{21}) \right)$$

$$[l = 4, m = 4] = B_{4,4}^+(q) \left( \frac{3\sqrt{35}}{64\sqrt{2\pi}} \right) (3 - 4 \cos(2\phi_{21}) + \cos(4\phi_{21}))$$

**Structure factor for the 2D detector when the neutrons propagate along the vorticity direction:**

$$\begin{aligned} S^{\text{vorticity}}(q) = & 1 + B_{0,0}^+(q) \left( \frac{1}{\sqrt{\pi}} \right) + B_{2,0}^+(q) \left( \frac{1}{4} \sqrt{\frac{5}{\pi}} \right) (1 + 3 \cos(2\phi_{21})) + B_{2,1}^+(q) \left( \sqrt{\frac{15}{2\pi}} \right) \sin(\phi_{21}) \cos(\phi_{21}) + B_{2,2}^+(q) \left( \frac{1}{4} \sqrt{\frac{15}{2\pi}} \right) (1 - \cos(2\phi_{21})) \\ & + B_{4,0}^+(q) \left( \frac{3}{64\sqrt{\pi}} \right) (9 + 20 \cos(2\phi_{21}) + 35 \cos(4\phi_{21})) + B_{4,1}^+(q) \left( \frac{3\sqrt{5}}{8\sqrt{\pi}} \right) \left( \sin(\phi_{21}) \cos(\phi_{21}) + \frac{7}{4} \sin(4\phi_{21}) \right) \\ & + B_{4,2}^+(q) \left( \frac{3\sqrt{5}}{16\sqrt{2\pi}} \right) \left( \frac{3}{2} + 2 \cos(2\phi_{21}) - \frac{7}{2} \cos(4\phi_{21}) \right) + B_{4,3}^+(q) \left( \frac{3}{32} \sqrt{\frac{35}{\pi}} \right) (2 \sin(2\phi_{21}) + \sin(4\phi_{21})) \\ & + B_{4,4}^+(q) \left( \frac{3\sqrt{35}}{64\sqrt{2\pi}} \right) (3 - 4 \cos(2\phi_{21}) + \cos(4\phi_{21})) + \dots (l > 4) \end{aligned}$$

$W_n$ 's for the 2D detector when the neutrons propagate along the vorticity direction:

$$\begin{aligned}
W_n^{\text{vorticity}}(q)S^{eq}(q) &= \frac{1}{2\pi} \int_0^{2\pi} \cos(n\phi_{21})S(q)d\phi_{21} \\
&= 1 + B_{0,0}^+(q)\left(\frac{1}{\sqrt{\pi}}\right) + B_{2,0}^+(q)\left(\frac{1}{4}\sqrt{\frac{5}{\pi}}\right)(1 + 3\cos(2\phi_{21})) + B_{2,1}^+(q)\left(\sqrt{\frac{15}{2\pi}}\right)\sin(\phi_{21})\cos(\phi_{21}) + B_{2,2}^+(q)\left(\frac{1}{4}\sqrt{\frac{15}{2\pi}}\right)(1 - \cos(2\phi_{21})) \\
&\quad + B_{4,0}^+(q)\left(\frac{3}{64\sqrt{\pi}}\right)(9 + 20\cos(2\phi_{21}) + 35\cos(4\phi_{21})) + B_{4,1}^+(q)\left(\frac{3\sqrt{5}}{8\sqrt{\pi}}\right)\left(\sin(\phi_{21})\cos(\phi_{21}) + \frac{7}{4}\sin(4\phi_{21})\right) \\
W_0^{\text{vorticity}}(q)S^{eq}(q) &= \frac{1}{2\pi} \int_0^{2\pi} \cos(0\phi_{21})d\phi_{21} \\
&\quad + B_{4,2}^+(q)\left(\frac{3\sqrt{5}}{16\sqrt{2\pi}}\right)\left(\frac{3}{2} + 2\cos(2\phi_{21}) - \frac{7}{2}\cos(4\phi_{21})\right) + B_{4,3}^+(q)\left(\frac{3}{32}\sqrt{\frac{35}{\pi}}\right)(2\sin(2\phi_{21}) + \sin(4\phi_{21})) \\
&\quad + B_{4,4}^+(q)\left(\frac{3\sqrt{35}}{64\sqrt{2\pi}}\right)(3 - 4\cos(2\phi_{21}) + \cos(4\phi_{21})) + \dots (l > 4) \\
W_0^{\text{vorticity}}(q)S^{eq}(q) &= \frac{1}{2\pi} \int_0^{2\pi} \cos(0\phi_{21})d\phi_{21} \\
&\quad + B_{0,0}^+(q)\left(\frac{1}{\sqrt{\pi}}\right) + B_{2,0}^+(q)\left(\frac{1}{4}\sqrt{\frac{5}{\pi}}\right) + B_{2,2}^+(q)\left(\frac{1}{4}\sqrt{\frac{15}{2\pi}}\right) \\
&\quad + B_{4,0}^+(q)\frac{27}{64\sqrt{\pi}} + B_{4,2}^+(q)\left(\frac{9\sqrt{5}}{32\sqrt{2\pi}}\right) + B_{4,4}^+(q)\left(\frac{9\sqrt{35}}{64\sqrt{2\pi}}\right) + \dots (l > 4) \\
W_0^{\text{vorticity}}(q)S^{eq}(q) &= 1 + B_{0,0}^+(q)\left(\frac{1}{\sqrt{\pi}}\right) + B_{2,0}^+(q)\left(\frac{1}{4}\sqrt{\frac{5}{\pi}}\right) + B_{2,2}^+(q)\left(\frac{1}{4}\sqrt{\frac{15}{2\pi}}\right) + B_{4,0}^+(q)\left(\frac{27}{64\sqrt{\pi}}\right) + B_{4,2}^+(q)\left(\frac{9\sqrt{5}}{32\sqrt{2\pi}}\right) + B_{4,4}^+(q)\left(\frac{9\sqrt{35}}{64\sqrt{2\pi}}\right) + \dots (l > 4)
\end{aligned}$$

$$\begin{aligned}
W_2^{\text{vorticity}}(q)S^{eq}(q) &= \frac{1}{2\pi} \int_0^{2\pi} \cos(2\phi_{21})S(q)d\phi_{21} \\
&= 1 + B_{0,0}^+(q) \left( \frac{1}{\sqrt{\pi}} \right) + B_{2,0}^+(q) \left( \frac{1}{4} \sqrt{\frac{5}{\pi}} \right) (1 + 3\cos(2\phi_{21})) + B_{2,1}^+(q) \left( \sqrt{\frac{15}{2\pi}} \right) \sin(\phi_{21})\cos(\phi_{21}) + B_{2,2}^+(q) \left( \frac{1}{4} \sqrt{\frac{15}{2\pi}} \right) (1 - \cos(2\phi_{21})) \\
W_2^{\text{vorticity}}(q)S^{eq}(q) &= \frac{1}{2\pi} \int_0^{2\pi} \cos(2\phi_{21})d\phi_{21} \\
&+ B_{4,0}^+(q) \left( \frac{3}{64\sqrt{\pi}} \right) (9 + 20\cos(2\phi_{21}) + 35\cos(4\phi_{21})) + B_{4,1}^+(q) \left( \frac{3\sqrt{5}}{8\sqrt{\pi}} \right) \left( \sin(\phi_{21})\cos(\phi_{21}) + \frac{7}{4}\sin(4\phi_{21}) \right) \\
&+ B_{4,2}^+(q) \left( \frac{3\sqrt{5}}{16\sqrt{2\pi}} \right) \left( \frac{3}{2} + 2\cos(2\phi_{21}) - \frac{7}{2}\cos(4\phi_{21}) \right) + B_{4,3}^+(q) \left( \frac{3}{32} \sqrt{\frac{35}{\pi}} \right) (2\sin(2\phi_{21}) + \sin(4\phi_{21})) \\
&+ B_{4,4}^+(q) \left( \frac{3\sqrt{35}}{64\sqrt{2\pi}} \right) (3 - 4\cos(2\phi_{21}) + \cos(4\phi_{21})) + \dots (l > 4) \\
W_2^{\text{vorticity}}(q)S^{eq}(q) &= \frac{1}{2\pi} \int_0^{2\pi} \cos(2\phi_{21})d\phi_{21} \\
&+ B_{2,0}^+(q) \left( \frac{3}{4} \sqrt{\frac{5}{\pi}} \right) \cos(2\phi_{21}) + B_{2,2}^+(q) \left( -\frac{1}{4} \sqrt{\frac{15}{2\pi}} \right) \cos(2\phi_{21}) \\
&+ B_{4,0}^+(q) \frac{60}{64\sqrt{\pi}} \cos(2\phi_{21}) + B_{4,2}^+(q) \left( \frac{3\sqrt{5}}{8\sqrt{2\pi}} \right) \cos(2\phi_{21}) + B_{4,4}^+(q) \left( \frac{-3\sqrt{35}}{16\sqrt{2\pi}} \right) \cos(2\phi_{21}) + \dots (l > 4) \\
W_2^{\text{vorticity}}(q)S^{eq}(q) &= \frac{1}{2} \left( B_{2,0}^+(q) \left( \frac{3}{4} \sqrt{\frac{5}{\pi}} \right) - B_{2,2}^+(q) \left( \frac{1}{4} \sqrt{\frac{15}{2\pi}} \right) + B_{4,0}^+(q) \left( \frac{60}{64\sqrt{\pi}} \right) + B_{4,2}^+(q) \left( \frac{3\sqrt{5}}{8\sqrt{2\pi}} \right) - B_{4,4}^+(q) \left( \frac{3\sqrt{35}}{16\sqrt{2\pi}} \right) + \dots (l > 4) \right) \\
W_2^{\text{vorticity}}(q)S^{eq}(q) &= B_{2,0}^+(q) \left( \frac{3}{8} \sqrt{\frac{5}{\pi}} \right) - B_{2,2}^+(q) \left( \frac{1}{8} \sqrt{\frac{15}{2\pi}} \right) + B_{4,0}^+(q) \left( \frac{60}{128\sqrt{\pi}} \right) + B_{4,2}^+(q) \left( \frac{3\sqrt{5}}{16\sqrt{2\pi}} \right) - B_{4,4}^+(q) \left( \frac{3\sqrt{35}}{32\sqrt{2\pi}} \right) + \dots (l > 4)
\end{aligned}$$

$$\begin{aligned}
W_4^{\text{vorticity}}(q)S^{eq}(q) &= \frac{1}{2\pi} \int_0^{2\pi} \cos(4\phi_{21})S(q)d\phi_{21} \\
&= \frac{1}{2\pi} \int_0^{2\pi} \left[ 1 + B_{0,0}^+(q) \left( \frac{1}{\sqrt{\pi}} \right) + B_{2,0}^+(q) \left( \frac{1}{4} \sqrt{\frac{5}{\pi}} \right) (1 + 3\cos(2\phi_{21})) + B_{2,1}^+(q) \left( \sqrt{\frac{15}{2\pi}} \right) \sin(\phi_{21}) \cos(\phi_{21}) + B_{2,2}^+(q) \left( \frac{1}{4} \sqrt{\frac{15}{2\pi}} \right) (1 - \cos(2\phi_{21})) \right. \\
&\quad \left. + B_{4,0}^+(q) \left( \frac{3}{64\sqrt{\pi}} \right) (9 + 20\cos(2\phi_{21}) + 35\cos(4\phi_{21})) + B_{4,1}^+(q) \left( \frac{3\sqrt{5}}{8\sqrt{\pi}} \right) \left( \sin(\phi_{21}) \cos(\phi_{21}) + \frac{7}{4} \sin(4\phi_{21}) \right) \right] \cos(4\phi_{21}) d\phi_{21} \\
W_4^{\text{vorticity}}(q)S^{eq}(q) &= \frac{1}{2\pi} \int_0^{2\pi} \left[ + B_{4,2}^+(q) \left( \frac{3\sqrt{5}}{16\sqrt{2\pi}} \right) \left( \frac{3}{2} + 2\cos(2\phi_{21}) - \frac{7}{2}\cos(4\phi_{21}) \right) + B_{4,3}^+(q) \left( \frac{3}{32} \sqrt{\frac{35}{\pi}} \right) (2\sin(2\phi_{21}) + \sin(4\phi_{21})) \right. \\
&\quad \left. + B_{4,4}^+(q) \left( \frac{3\sqrt{35}}{64\sqrt{2\pi}} \right) (3 - 4\cos(2\phi_{21}) + \cos(4\phi_{21})) + \dots (l > 4) \right] \cos(4\phi_{21}) d\phi_{21} \\
W_4^{\text{vorticity}}(q)S^{eq}(q) &= \frac{1}{2\pi} \int_0^{2\pi} \left[ B_{4,0}^+(q) \left( \frac{105}{64\sqrt{\pi}} \right) \cos(4\phi_{21}) + B_{4,2}^+(q) \left( \frac{-21\sqrt{5}}{32\sqrt{2\pi}} \right) \cos(4\phi_{21}) + B_{4,4}^+(q) \left( \frac{3\sqrt{35}}{64\sqrt{2\pi}} \right) \cos(4\phi_{21}) + \dots (l > 4) \cos(4\phi_{21}) \right] d\phi_{21} \\
W_4^{\text{vorticity}}(q)S^{eq}(q) &= 2 \left[ B_{4,0}^+(q) \left( \frac{105}{64\sqrt{\pi}} \right) - B_{4,2}^+(q) \left( \frac{21\sqrt{5}}{16\sqrt{2\pi}} \right) + B_{4,4}^+(q) \left( \frac{3\sqrt{35}}{64\sqrt{2\pi}} \right) + \dots (l > 4) \right] \\
W_6^{\text{vorticity}}(q)S^{eq}(q) &= \frac{1}{2\pi} \int_0^{2\pi} \cos(6\phi_{21})S(q)d\phi_{21} \\
W_6^{\text{vorticity}}(q)S^{eq}(q) &= 0
\end{aligned}$$

$$\begin{aligned}
W_{12}^{vorticity}(q)S^{eq}(q) &= \frac{1}{2\pi} \int_0^{2\pi} \cos(\phi_{21}) \sin(\phi_{21}) S(q) d\phi_{21} \\
&= 1 + B_{0,0}^+(q) \left( \frac{1}{\sqrt{\pi}} \right) + B_{2,0}^+(q) \left( \frac{1}{4} \sqrt{\frac{5}{\pi}} \right) (1 + 3 \cos(2\phi_{21})) + B_{2,1}^+(q) \left( \sqrt{\frac{15}{2\pi}} \right) \sin(\phi_{21}) \cos(\phi_{21}) + B_{2,2}^+(q) \left( \frac{1}{4} \sqrt{\frac{15}{2\pi}} \right) (1 - \cos(2\phi_{21})) \\
&\quad + B_{4,0}^+(q) \frac{3}{64\sqrt{\pi}} (17 + 260 \cos(2\phi_{21}) + 35 \cos(4\phi_{21})) + B_{4,1}^+(q) \left( \frac{3\sqrt{5}}{8\sqrt{\pi}} \right) \left( \sin(\phi_{21}) \cos(\phi_{21}) + \frac{7}{4} \sin(4\phi_{21}) \right) \\
W_{12}^{vorticity}(q)S^{eq}(q) &= \frac{1}{2\pi} \int_0^{2\pi} \cos(\phi_{21}) \sin(\phi_{21}) d\phi_{21} \\
&\quad + B_{4,2}^+(q) \left( \frac{3\sqrt{5}}{16\sqrt{2\pi}} \right) \left( \frac{3}{2} + 2 \cos(2\phi_{21}) - \frac{7}{2} \cos(4\phi_{21}) \right) + B_{4,3}^+(q) \left( \frac{3}{32} \sqrt{\frac{35}{\pi}} \right) (2 \sin(2\phi_{21}) + \sin(4\phi_{21})) \\
&\quad + B_{4,4}^+(q) \left( \frac{3\sqrt{35}}{64\sqrt{2\pi}} \right) (3 - 4 \cos(2\phi_{21}) + \cos(4\phi_{21})) + \dots (l > 4) \\
W_{12}^{vorticity}(q)S^{eq}(q) &= \frac{1}{2\pi} \int_0^{2\pi} \left( B_{2,1}^+(q) \left( \sqrt{\frac{15}{2\pi}} \right) \sin(\phi_{21}) \cos(\phi_{21}) + B_{4,1}^+(q) \left( \frac{3\sqrt{5}}{8\sqrt{\pi}} \right) \sin(\phi_{21}) \cos(\phi_{21}) + \dots (l > 4) \right) \cos(\phi_{21}) \sin(\phi_{21}) d\phi_{21} \\
W_{12}^{vorticity}(q)S^{eq}(q) &= \frac{1}{8} \left( B_{2,1}^+(q) \left( \sqrt{\frac{15}{2\pi}} \right) + B_{4,1}^+(q) \left( \frac{3\sqrt{5}}{8\sqrt{\pi}} \right) + \dots (l > 4) \right)
\end{aligned}$$

**Tangential (velocity gradient-vorticity)**

**For the 2D detector when the neutrons propagate along the flow direction:**

$$\frac{q_x}{q} = 0$$

$$\frac{q_y}{q} = -\sin(\phi_{23})$$

$$q_z = -\cos(\phi_{23})$$

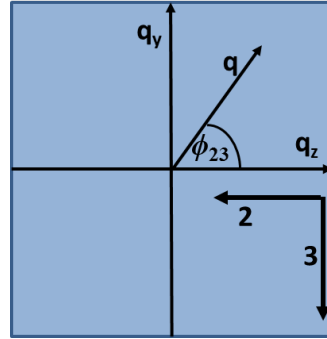

$$[l=0, m=0] = B_{0,0}^+(q) \left( \frac{1}{\sqrt{\pi}} \right)$$

$$[l=2, m=0] = B_{2,0}^+(q) \left( \sqrt{\frac{5}{4\pi}} \left( 3 \frac{q_z^2}{q^2} - 1 \right) \right)$$

$$[l=2, m=0] = B_{2,0}^+(q) \left( \sqrt{\frac{5}{4\pi}} (-1 + 3 \cos^2(\phi_{23})) \right)$$

$$[l=2, m=0] = B_{2,0}^+(q) \left( \sqrt{\frac{5}{4\pi}} \left( -1 + 3 \left( \frac{1}{2} (1 + \cos(2\phi_{23})) \right) \right) \right)$$

$$[l=2, m=0] = B_{2,0}^+(q) \left( \frac{1}{2} \sqrt{\frac{5}{4\pi}} (1 + 3 \cos(2\phi_{23})) \right)$$

$$[l=2, m=0] = B_{2,0}^+(q) \left( \frac{1}{4} \sqrt{\frac{5}{\pi}} (1 + 3 \cos(2\phi_{23})) \right)$$

$$[l = 2, m = 1] = B_{2,1}^+(q) \left( \sqrt{\frac{15}{2\pi}} \left( \frac{q_x q_z}{q^2} \right) \right)$$

$$[l = 2, m = 1] = 0$$

$$[l = 2, m = 2] = B_{2,2}^+(q) \sqrt{\frac{15}{8\pi}} \left( \frac{q_x^2 - q_y^2}{q^2} \right)$$

$$[l = 2, m = 2] = B_{2,2}^+(q) \sqrt{\frac{15}{8\pi}} \left( \frac{-q_y^2}{q^2} \right)$$

$$[l = 2, m = 2] = B_{2,2}^+(q) \left( \sqrt{\frac{15}{8\pi}} \right) \sin^2(\phi_{23})$$

$$[l = 2, m = 2] = B_{2,2}^+(q) \left( \sqrt{\frac{15}{8\pi}} \right) \left( \frac{1}{2} (1 - \cos(2\phi_{23})) \right)$$

$$[l = 2, m = 2] = B_{2,2}^+(q) \left( \frac{1}{2} \sqrt{\frac{15}{8\pi}} \right) (1 - \cos(2\phi_{23}))$$

$$[l = 2, m = 2] = B_{2,2}^+(q) \left( \frac{1}{4} \sqrt{\frac{15}{2\pi}} \right) (1 - \cos(2\phi_{23}))$$

$$[l = 4, m = 0] = B_{4,0}^+(q) \frac{3}{8\sqrt{\pi}} \left( 3 - 30 \left( \frac{q_z^2}{q^2} \right) + 35 \left( \frac{q_z^4}{q^4} \right) \right)$$

$$[l = 4, m = 0] = B_{4,0}^+(q) \left( \frac{3}{8\sqrt{\pi}} \right) (3 - 30 \cos^2(\phi_{23}) + 35 \cos^4(\phi_{23}))$$

$$[l = 4, m = 0] = B_{4,0}^+(q) \left( \frac{3}{8\sqrt{\pi}} \right) \left( 3 - 15(1 + \cos(2\phi_{23})) + \frac{35}{8}(3 + 4 \cos(2\phi_{23}) + \cos(4\phi_{23})) \right)$$

$$[l = 4, m = 0] = B_{4,0}^+(q) \left( \frac{3}{8\sqrt{\pi}} \right) \left( -12 - 15 \cos(2\phi_{23}) + \frac{35}{8}(3 + 4 \cos(2\phi_{23}) + \cos(4\phi_{23})) \right)$$

$$[l = 4, m = 0] = B_{4,0}^+(q) \left( \frac{3}{8\sqrt{\pi}} \right) \left( -\frac{96}{8} - \frac{120}{8} \cos(2\phi_{23}) + \frac{105}{8} + \frac{140}{8} \cos(2\phi_{23}) + \frac{35}{8} \cos(4\phi_{23}) \right)$$

$$[l = 4, m = 0] = B_{4,0}^+(q) \left( \frac{3}{64\sqrt{\pi}} \right) (9 - 20 \cos(2\phi_{23}) - 35 \cos(4\phi_{23}))$$

$$[l = 4, m = 1] = B_{4,1}^+(q) \frac{3\sqrt{5}}{4\sqrt{\pi}} \left( \frac{q_x q_z}{q^2} \right) \left( 7 \left( \frac{q_z^2}{q^2} \right) - 3 \right)$$

$$[l = 4, m = 1] = 0$$



$$[l = 4, m = 2] = B_{4,2}^+(q) \left( \frac{3\sqrt{5}}{4\sqrt{2\pi}} \right) \left( \frac{q_x^2 - q_y^2}{q^2} \right) \left( -1 + 7 \left( \frac{q_z^2}{q^2} \right) \right)$$

$$[l = 4, m = 2] = B_{4,2}^+(q) \left( \frac{3\sqrt{5}}{4\sqrt{2\pi}} \right) \left( \frac{-q_y^2}{q^2} \right) \left( -1 + 7 \left( \frac{q_z^2}{q^2} \right) \right)$$

$$[l = 4, m = 2] = B_{4,2}^+(q) \left( \frac{-3\sqrt{5}}{4\sqrt{2\pi}} \right) \sin^2(\phi_{23}) (-1 + 7 \cos^2(\phi_{23}))$$

$$[l = 4, m = 2] = B_{4,2}^+(q) \left( \frac{-3\sqrt{5}}{4\sqrt{2\pi}} \right) \left( \frac{1}{2} (1 - \cos(2\phi_{23})) \right) \left( -1 + 7 \left( \frac{1}{2} (1 + \cos(2\phi_{23})) \right) \right)$$

$$[l = 4, m = 2] = B_{4,2}^+(q) \left( \frac{-3\sqrt{5}}{8\sqrt{2\pi}} \right) (1 - \cos(2\phi_{23})) (5 + 7 \cos(2\phi_{23}))$$

$$[l = 4, m = 2] = B_{4,2}^+(q) \left( \frac{-3\sqrt{5}}{32\sqrt{2\pi}} \right) \left( 5 + 2 \cos(2\phi_{23}) - \frac{7}{2} \cos(4\phi_{23}) \right)$$

$$[l = 4, m = 3] = B_{4,3}^+(q) \left( \frac{3}{4} \sqrt{\frac{35}{\pi}} \right) \left( \frac{q_x q_z (q_x^2 - 3q_y^2)}{q^4} \right)$$

$$[l = 4, m = 3] = 0$$

$$[l = 4, m = 4] = B_{4,4}^+(q) \left( \frac{3\sqrt{35}}{8\sqrt{2\pi}} \right) \left( \frac{(q_x^2 - 2q_x q_y - q_y^2)(q_x^2 + 2q_x q_y - q_y^2)}{q^4} \right)$$

$$[l = 4, m = 4] = B_{4,4}^+(q) \left( \frac{3\sqrt{35}}{8\sqrt{2\pi}} \right) \left( \frac{q_y^4}{q^4} \right)$$

$$[l = 4, m = 4] = B_{4,4}^+(q) \left( \frac{-3\sqrt{35}}{8\sqrt{2\pi}} \right) (\sin^4(\phi_{23}))$$

$$[l = 4, m = 4] = B_{4,4}^+(q) \left( \frac{-3\sqrt{35}}{64\sqrt{2\pi}} \right) (3 - 4\cos(2\phi_{23}) + \cos(4\phi_{23}))$$

**Structure factor for the 2D detector when the neutrons propagate along the flow direction:**

$$\begin{aligned} S^{velocity}(q) = & 1 + B_{0,0}^+(q) \left( \frac{1}{\sqrt{\pi}} \right) + B_{2,0}^+(q) \left( \frac{1}{4} \sqrt{\frac{5}{\pi}} (1 + 3\cos(2\phi_{23})) \right) + B_{2,2}^+(q) \left( \frac{1}{4} \sqrt{\frac{15}{2\pi}} (1 - \cos(2\phi_{23})) \right) \\ & + B_{4,0}^+(q) \left( \frac{3}{64\sqrt{\pi}} \right) (9 - 20\cos(2\phi_{23}) - 35\cos(4\phi_{23})) + B_{4,2}^+(q) \left( \frac{-3\sqrt{5}}{32\sqrt{2\pi}} \right) \left( 5 + 2\cos(2\phi_{23}) - \frac{7}{2}\cos(4\phi_{23}) \right) \\ & + B_{4,4}^+(q) \left( \frac{-3\sqrt{35}}{64\sqrt{2\pi}} \right) (3 - 4\cos(2\phi_{23}) + \cos(4\phi_{23})) + \dots (l > 4) \end{aligned}$$

$W_n$ 's for the 2D detector when the neutrons propagate along the flow direction:

$$W_n^{velocity}(q)S^{eq}(q) = \frac{1}{2\pi} \int_0^{2\pi} \cos(n\phi_{23})S(q)d\phi_{23}$$

$$1 + B_{0,0}^+(q) \left( \frac{1}{\sqrt{\pi}} \right) + B_{2,0}^+(q) \left( \frac{1}{4} \sqrt{\frac{5}{\pi}} (1 + 3 \cos(2\phi_{23})) \right) + B_{2,2}^+(q) \left( \frac{1}{4} \sqrt{\frac{15}{2\pi}} (1 - \cos(2\phi_{23})) \right)$$

$$W_0^{velocity}(q)S^{eq}(q) = \frac{1}{2\pi} \int_0^{2\pi} +B_{4,0}^+(q) \left( \frac{3}{64\sqrt{\pi}} \right) (9 - 20 \cos(2\phi_{23}) - 35 \cos(4\phi_{23})) + B_{4,2}^+(q) \left( \frac{-3\sqrt{5}}{32\sqrt{2\pi}} \right) \left( 5 + 2 \cos(2\phi_{23}) - \frac{7}{2} \cos(4\phi_{23}) \right) \cos(0\phi_{23}) d\phi_{23}$$

$$+ B_{4,4}^+(q) \left( \frac{-3\sqrt{35}}{64\sqrt{2\pi}} \right) (3 - 4 \cos(2\phi_{23}) + \cos(4\phi_{23})) + \dots (l > 4)$$

$$W_0^{velocity}(q)S^{eq}(q) = \frac{1}{2\pi} \int_0^{2\pi} 1 + B_{0,0}^+(q) \left( \frac{1}{\sqrt{\pi}} \right) + B_{2,0}^+(q) \left( \frac{1}{4} \sqrt{\frac{5}{\pi}} \right) + B_{2,2}^+(q) \left( \frac{1}{4} \sqrt{\frac{15}{2\pi}} \right) \cos(0\phi_{23}) d\phi_{23}$$

$$+ B_{4,0}^+(q) \left( \frac{27}{64\sqrt{\pi}} \right) + B_{4,2}^+(q) \left( \frac{-15\sqrt{5}}{32\sqrt{2\pi}} \right) + B_{4,4}^+(q) \left( \frac{-9\sqrt{35}}{64\sqrt{2\pi}} \right) + \dots (l > 4)$$

$$W_0^{velocity}(q)S^{eq}(q) = 1 + B_{0,0}^+(q) \left( \frac{1}{\sqrt{\pi}} \right) + B_{2,0}^+(q) \left( \frac{1}{4} \sqrt{\frac{5}{\pi}} \right) + B_{2,2}^+(q) \left( \frac{1}{4} \sqrt{\frac{15}{2\pi}} \right) + B_{4,0}^+(q) \left( \frac{27}{64\sqrt{\pi}} \right) - B_{4,2}^+(q) \left( \frac{15\sqrt{5}}{32\sqrt{2\pi}} \right) - B_{4,4}^+(q) \left( \frac{9\sqrt{35}}{64\sqrt{2\pi}} \right) + \dots (l > 4)$$

$$\begin{aligned}
W_2^{velocity}(q) S^{eq}(q) &= \frac{1}{2\pi} \int_0^{2\pi} \cos(2\phi_{23}) S(q) d\phi_{23} \\
&= 1 + B_{0,0}^+(q) \left( \frac{1}{\sqrt{\pi}} \right) + B_{2,0}^+(q) \left( \frac{1}{4} \sqrt{\frac{5}{\pi}} (1 + 3 \cos(2\phi_{23})) \right) + B_{2,2}^+(q) \left( \frac{1}{4} \sqrt{\frac{15}{2\pi}} (1 - \cos(2\phi_{23})) \right) \\
W_2^{velocity}(q) S^{eq}(q) &= \frac{1}{2\pi} \int_0^{2\pi} \left[ B_{4,0}^+(q) \left( \frac{3}{64\sqrt{\pi}} \right) (9 - 20 \cos(2\phi_{23}) - 35 \cos(4\phi_{23})) + B_{4,2}^+(q) \left( \frac{-3\sqrt{5}}{32\sqrt{2\pi}} \right) \left( 5 + 2 \cos(2\phi_{23}) - \frac{7}{2} \cos(4\phi_{23}) \right) \right] \cos(2\phi_{23}) d\phi_{23} \\
&\quad + B_{4,4}^+(q) \left( \frac{-3\sqrt{35}}{64\sqrt{2\pi}} \right) (3 - 4 \cos(2\phi_{23}) + \cos(4\phi_{23})) + \dots (l > 4) \\
W_2^{velocity}(q) S^{eq}(q) &= \frac{1}{2\pi} \int_0^{2\pi} \left[ B_{2,0}^+(q) \left( \frac{3}{4} \sqrt{\frac{5}{\pi}} \right) \cos(2\phi_{23}) + B_{2,2}^+(q) \left( \frac{-1}{4} \sqrt{\frac{15}{2\pi}} \right) \cos(2\phi_{23}) \right] \cos(2\phi_{23}) d\phi_{23} \\
&\quad + B_{4,0}^+(q) \left( \frac{-60}{64\sqrt{\pi}} \right) \cos(2\phi_{23}) + B_{4,2}^+(q) \left( \frac{-6\sqrt{5}}{32\sqrt{2\pi}} \right) \cos(2\phi_{23}) + B_{4,4}^+(q) \left( \frac{12\sqrt{35}}{64\sqrt{2\pi}} \right) + \dots (l > 4) \\
W_2^{velocity}(q) S^{eq}(q) &= \frac{1}{2} \left( B_{2,0}^+(q) \left( \frac{3}{4} \sqrt{\frac{5}{\pi}} \right) - B_{2,2}^+(q) \left( \frac{1}{4} \sqrt{\frac{15}{2\pi}} \right) - B_{4,0}^+(q) \left( \frac{60}{64\sqrt{\pi}} \right) \cos(2\phi_{23}) - B_{4,2}^+(q) \left( \frac{6\sqrt{5}}{32\sqrt{2\pi}} \right) \cos(2\phi_{23}) + B_{4,4}^+(q) \left( \frac{12\sqrt{35}}{64\sqrt{2\pi}} \right) + \dots (l > 4) \right)
\end{aligned}$$

$$\begin{aligned}
W_4^{velocity}(q)S^{eq}(q) &= \frac{1}{2\pi} \int_0^{2\pi} \cos(4\phi_{23})S(q)d\phi_{23} \\
&\quad + B_{0,0}^+(q) \left( \frac{1}{\sqrt{\pi}} \right) + B_{2,0}^+(q) \left( \frac{1}{4} \sqrt{\frac{5}{\pi}} (1 + 3 \cos(2\phi_{23})) \right) + B_{2,2}^+(q) \left( \frac{1}{4} \sqrt{\frac{15}{2\pi}} (1 - \cos(2\phi_{23})) \right) \\
W_4^{velocity}(q)S^{eq}(q) &= \frac{1}{2\pi} \int_0^{2\pi} + B_{4,0}^+(q) \left( \frac{3}{64\sqrt{\pi}} \right) (9 - 20 \cos(2\phi_{23}) - 35 \cos(4\phi_{23})) + B_{4,2}^+(q) \left( \frac{-3\sqrt{5}}{32\sqrt{2\pi}} \right) \left( 5 + 2 \cos(2\phi_{23}) - \frac{7}{2} \cos(4\phi_{23}) \right) \cos(4\phi_{23}) d\phi_{23} \\
W_6^{velocity}(q)S^{eq}(q) &= \frac{1}{2\pi} \int_0^{2\pi} \cos(6\phi_{23})S(q) \left( \frac{3\sqrt{35}}{64\sqrt{2\pi}} \right) (3 - 4 \cos(2\phi_{23}) + \cos(4\phi_{23})) + \dots (l > 4) \\
W_4^{velocity}(q)S^{eq}(q) &= \frac{1}{2\pi} \int_0^{2\pi} B_{4,0}^+(q) \left( \frac{-105}{64\sqrt{\pi}} \right) \cos(4\phi_{23}) + B_{4,2}^+(q) \left( \frac{21\sqrt{5}}{64\sqrt{2\pi}} \right) \cos(4\phi_{23}) + B_{4,4}^+(q) \left( \frac{-3\sqrt{35}}{64\sqrt{2\pi}} \right) \cos(4\phi_{23}) + \dots (l > 4) \cos(4\phi_{23}) d\phi_{23} \\
W_{4^2}^{velocity}(q)S^{eq}(q) &= \frac{1}{2\pi} \int_0^{2\pi} \cos(\phi_{23}) \sin(\phi_{23}) \left( \frac{105}{64\sqrt{\pi}} \right) S(q) d\phi_{23} - B_{4,2}^+(q) \left( \frac{21\sqrt{5}}{64\sqrt{2\pi}} \right) - B_{4,4}^+(q) \left( \frac{3\sqrt{35}}{64\sqrt{2\pi}} \right) + \dots (l > 4) \\
W_{12}^{velocity}(q)S^{eq}(q) &= 0
\end{aligned}$$

**Identities:**

$$\sin^2(\theta) = \frac{1}{2}(1 - \cos(2\theta))$$

$$\cos^2(\theta) = \frac{1}{2}(1 + \cos(2\theta))$$

$$\sin^4(\theta) = \frac{3}{8} - \frac{1}{2}\cos(2\theta) + \frac{1}{8}\cos(4\theta)$$

$$\cos^4(\theta) = \frac{3}{8} + \frac{1}{2}\cos(2\theta) + \frac{1}{8}\cos(4\theta)$$

$$\cos^2(\theta)\sin^2(\theta) = \frac{1}{8}(1 - \cos(4\theta))$$

$$\cos(\theta)\sin^3(\theta) = \frac{1}{4}\sin(2\theta) + \frac{1}{8}\sin(4\theta)$$

$$\cos^2(\theta) - \sin^2(\theta) = \cos(2\theta)$$

$$\cos(a)\cos(b) = \frac{1}{2}(\cos(a+b) + \cos(a-b))$$

$$\cos(a)\sin(b) = \frac{1}{2}(\sin(a+b) - \sin(a-b))$$

$$\sin(a)\cos(b) = \frac{1}{2}(\sin(a+b) + \sin(a-b))$$

$$\sin(a)\sin(b) = \frac{1}{2}(\cos(a-b) - \cos(a+b))$$

$$\cos(-a) = \cos(a)$$

$$\sin(-a) = -\sin(a)$$

$$\int_0^{2\pi} \sin \phi d\phi = -\cos \phi \Big|_0^{2\pi} = 0$$

$$\int_0^{2\pi} \sin^2 \phi d\phi = \left( \frac{\phi}{2} - \frac{1}{4} \sin 2\phi \right) \Big|_0^{2\pi} = \pi$$

$$\int_0^{2\pi} \sin^3 \phi d\phi = \left( -\cos \phi - \frac{1}{3} \cos^3 \phi \right) \Big|_0^{2\pi} = 0$$

$$\int_0^{2\pi} \sin^4 \phi d\phi = \left( \frac{3\phi}{8} - \frac{1}{4} \sin 2\phi + -\frac{1}{32} \sin 4\phi \right) \Big|_0^{2\pi} = \frac{3\pi}{4}$$

$$\int_0^{2\pi} \cos \phi d\phi = \sin \phi \Big|_0^{2\pi} = 0$$

$$\int_0^{2\pi} \cos^2 \phi d\phi = \left( \frac{\phi}{2} + \frac{1}{4} \sin 2\phi \right) \Big|_0^{2\pi} = \pi$$

$$\int_0^{2\pi} \cos^3 \phi d\phi = \left( \sin \phi - \frac{1}{3} \sin^3 \phi \right) \Big|_0^{2\pi} = 0$$

$$\int_0^{2\pi} \cos^4 \phi d\phi = \left( \frac{3\phi}{8} + \frac{1}{4} \sin 2\phi + \frac{1}{32} \sin 4\phi \right) \Big|_0^{2\pi} = \frac{3\pi}{4}$$

$$\int_0^{2\pi} \sin \phi \cos \phi d\phi = \frac{1}{2} \sin^2 \phi \Big|_0^{2\pi} = 0$$

$$\int_0^{2\pi} \sin \phi \cos^2 \phi d\phi = -\frac{1}{3} \cos^3 \phi \Big|_0^{2\pi} = 0$$

$$\int_0^{2\pi} \sin^2 \phi \cos \phi d\phi = \frac{1}{3} \sin^3 \phi \Big|_0^{2\pi} = 0$$

$$\int_0^{2\pi} \sin^2 \phi \cos^2 \phi d\phi = \left( \frac{\phi}{8} - \frac{1}{32} \sin 4\phi \right) \Big|_0^{2\pi} = \frac{\pi}{4}$$

$$\int_0^{2\pi} \sin \phi \cos^3 \phi d\phi = -\frac{1}{4} \cos^4 \phi \Big|_0^{2\pi} = 0$$

$$\int_0^{2\pi} \sin^3 \phi \cos \phi d\phi = \frac{1}{4} \sin^4 \phi \Big|_0^{2\pi} = 0$$
